# Supplementary material for: Stromal lymphocytes are associated with upgrade of B3 breast lesions
Source: PubMed Central journal article supplement (PMC11232297; doi:10.1186/s13058-024-01857-y), 2024-07-08

# Supplementary Figure 1. Case inclusion and exclusion

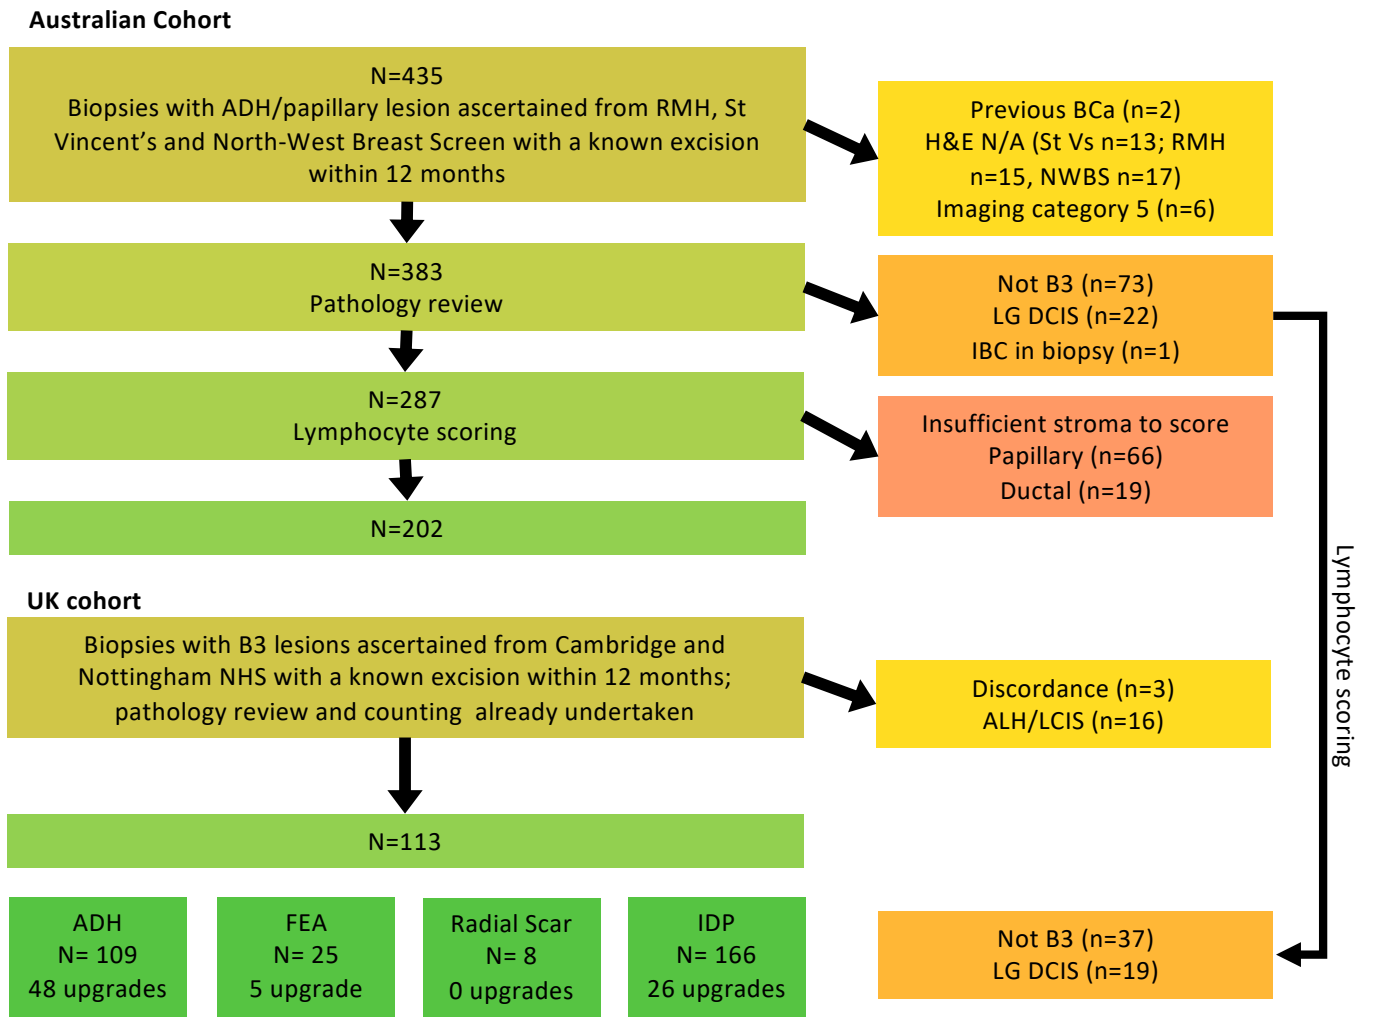

**Supplementary Figure 2. Examples of other ductal lesions that were not confirmed as ADH.** These ductal lesions include radial scar, columnar cell change (CCL), flat epithelial atypia (FEA) or usual ductal hyperplasia (UDH).

**Case SV36: Radial Scar**

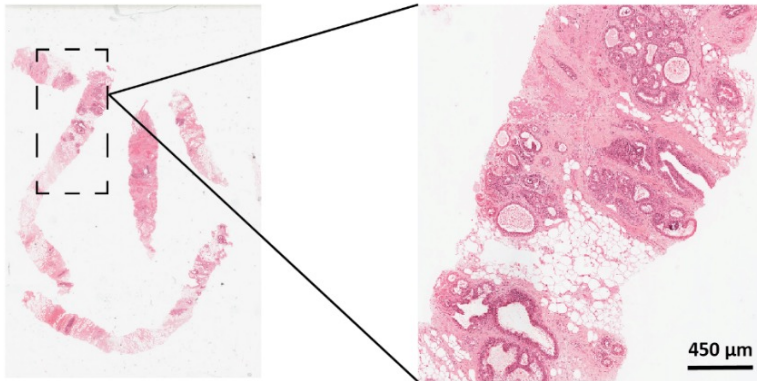

**Case SV32: Columnar cell change (CCL), usual ductal hyperplasia (UDH)**

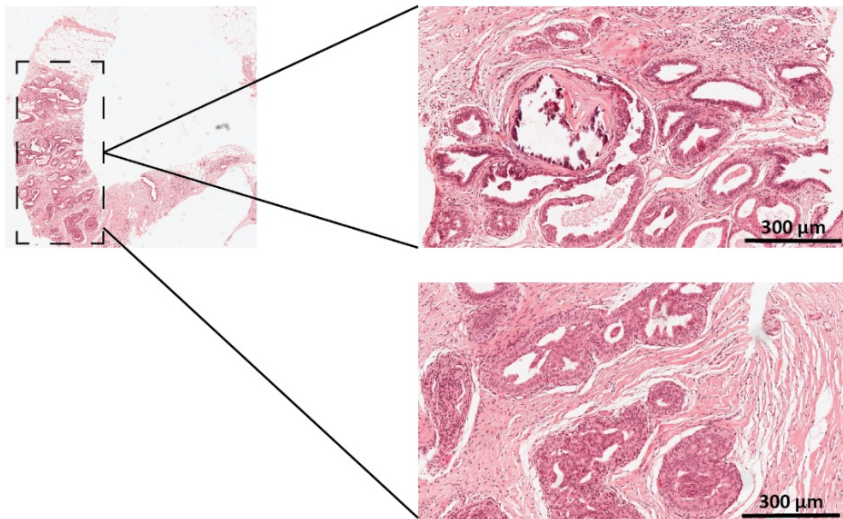

**Case SV73: Flat epithelial atypia (FEA)**

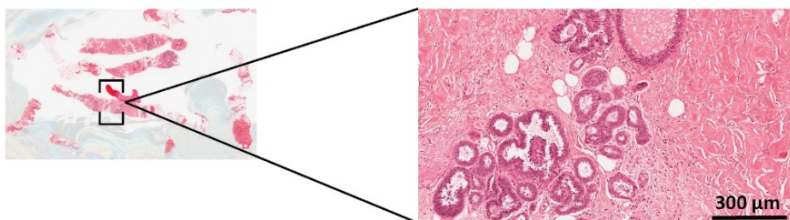

Supplementary Figure 3. Examples of excluded cases from analysis due to lack of specialised stroma in biopsies.

SV70: Core biopsy

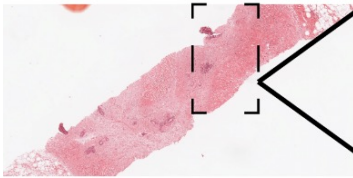

B3 lesion with cytological atypia

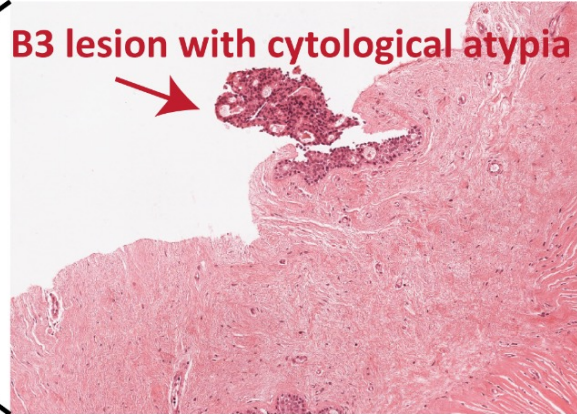

SV70: Excluded from lymphocyte counts:  
lack of specialised stroma

SV85: Core biopsy

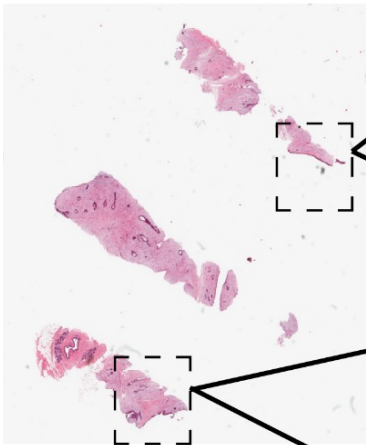

Fibroadenoma with UDH

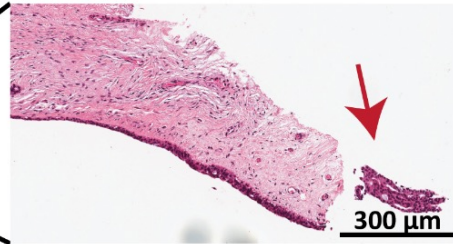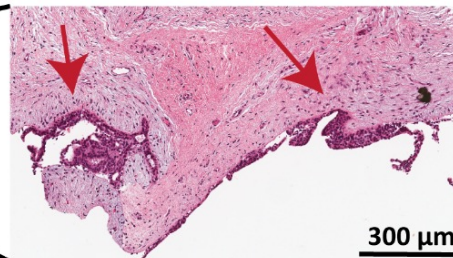

SV85: Excluded from lymphocyte counts:  
lack of specialised stroma

**Supplementary Figure 4. Grade of carcinoma and lymphocyte associations. A.** ADH synchronous with high grade carcinoma is more likely to have high lymphocytes when found in the same block. **B.** Breakdown of grade of upgrade related to lymphocytes

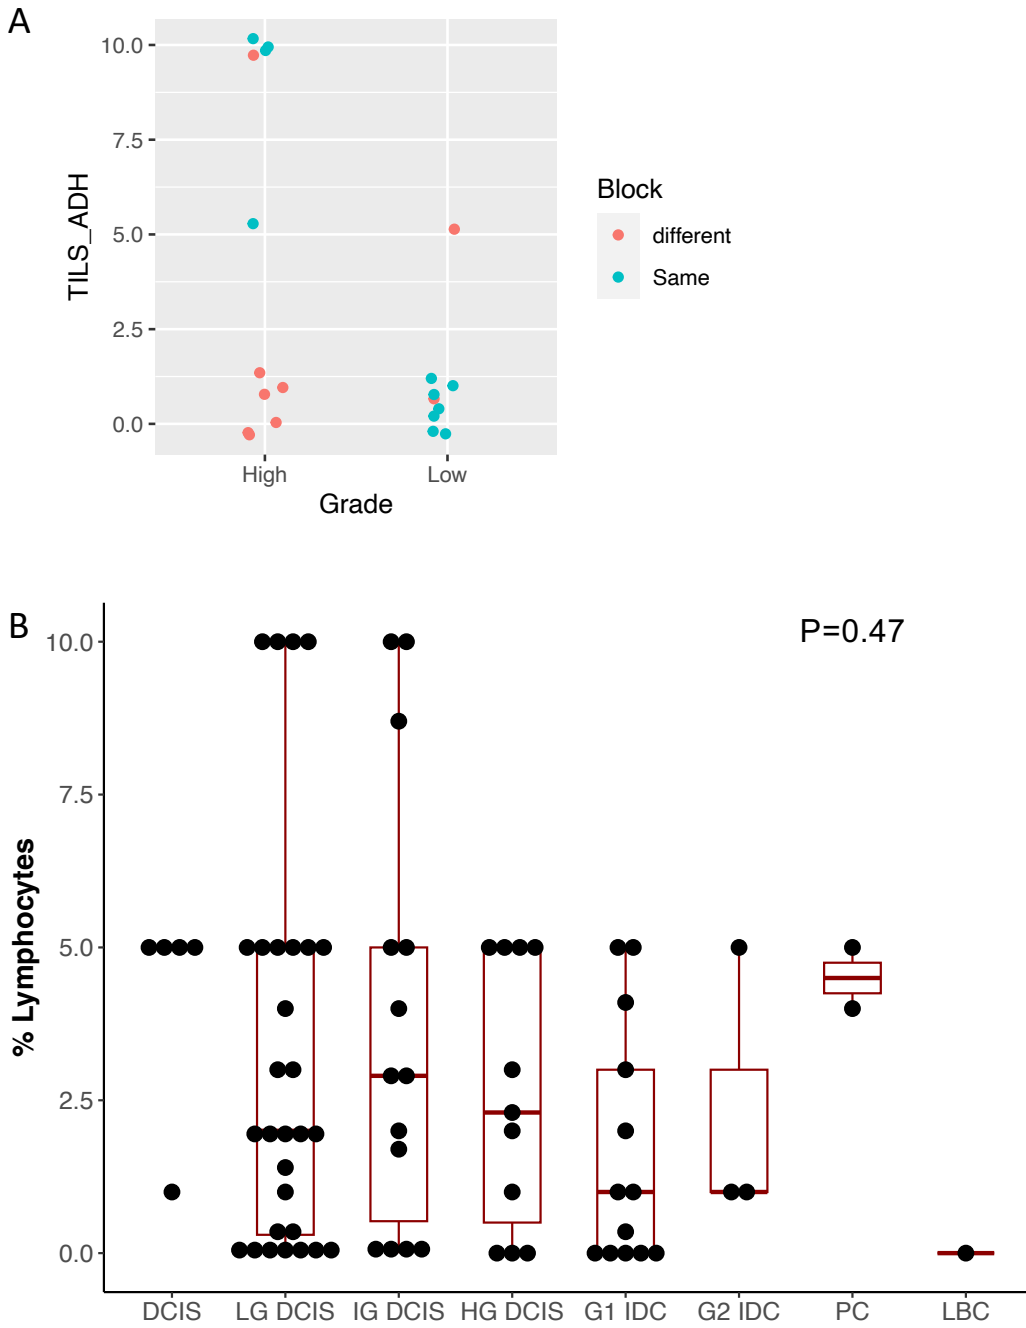

**Supplementary Figure 5. Sankey plot** showing type of lesion in the biopsy at left, with the outcome of the excision at right

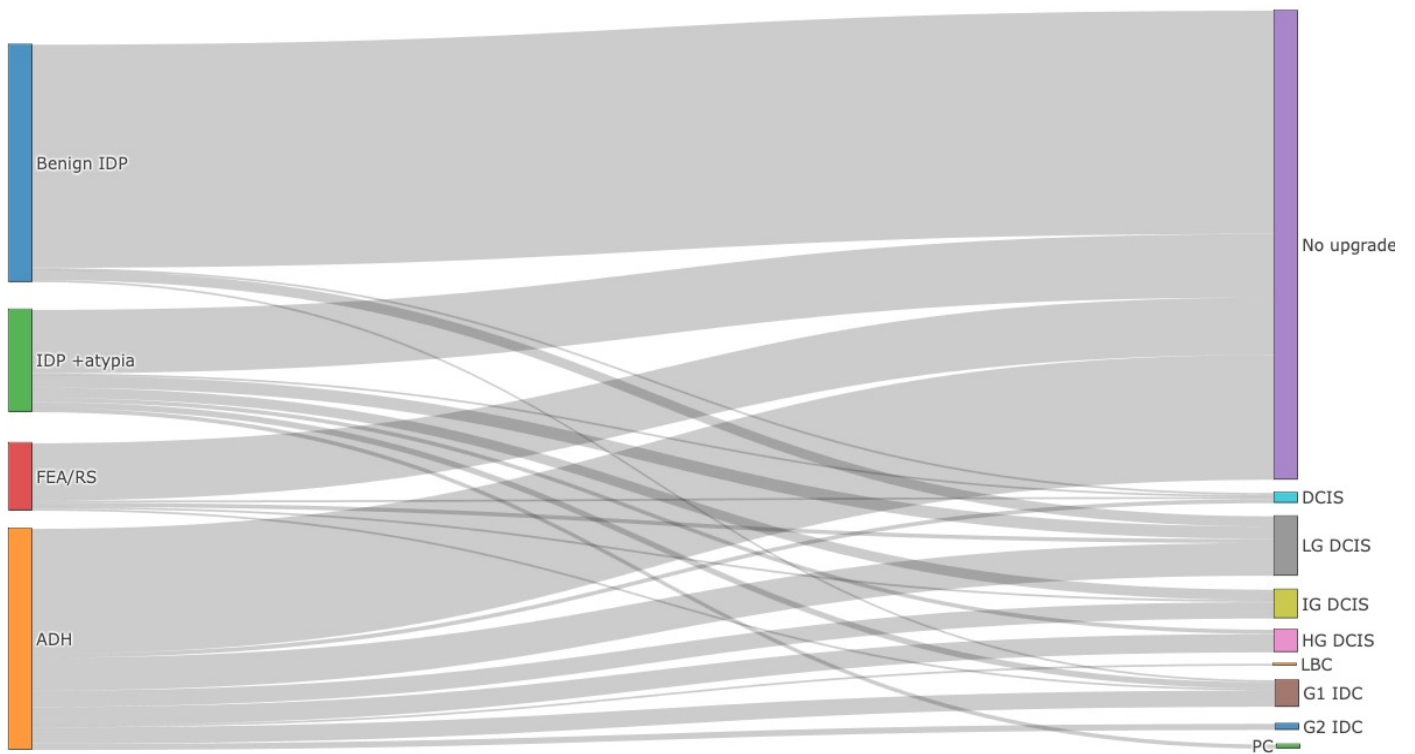

**Supplementary Figure 6. A. Nomogram for model to predict upgrade. B. Internal calibration plot of model**

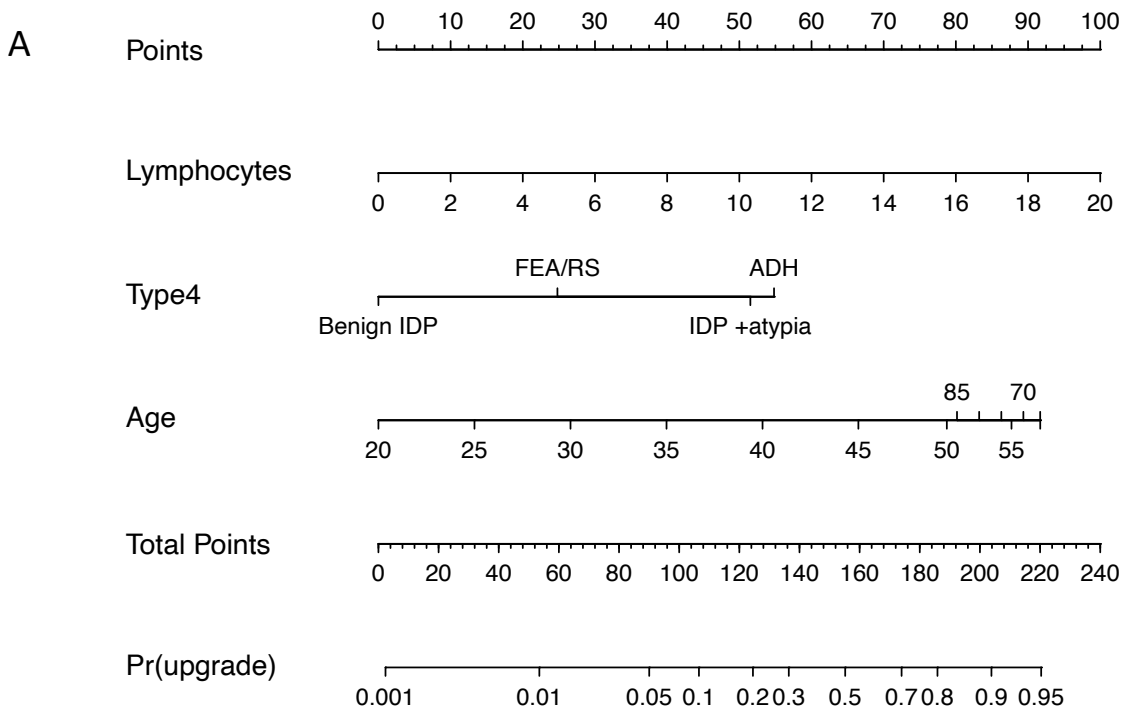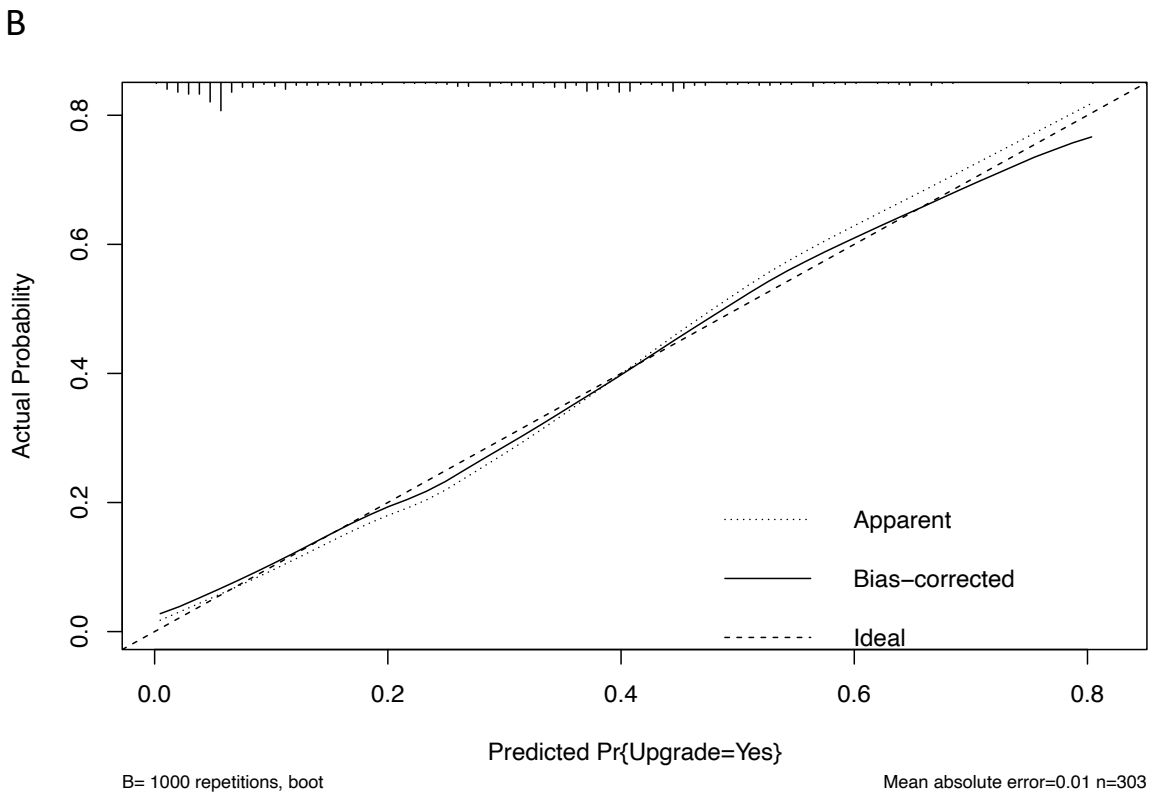

Supplementary Figure 7. Selection of a threshold for lymphocytes

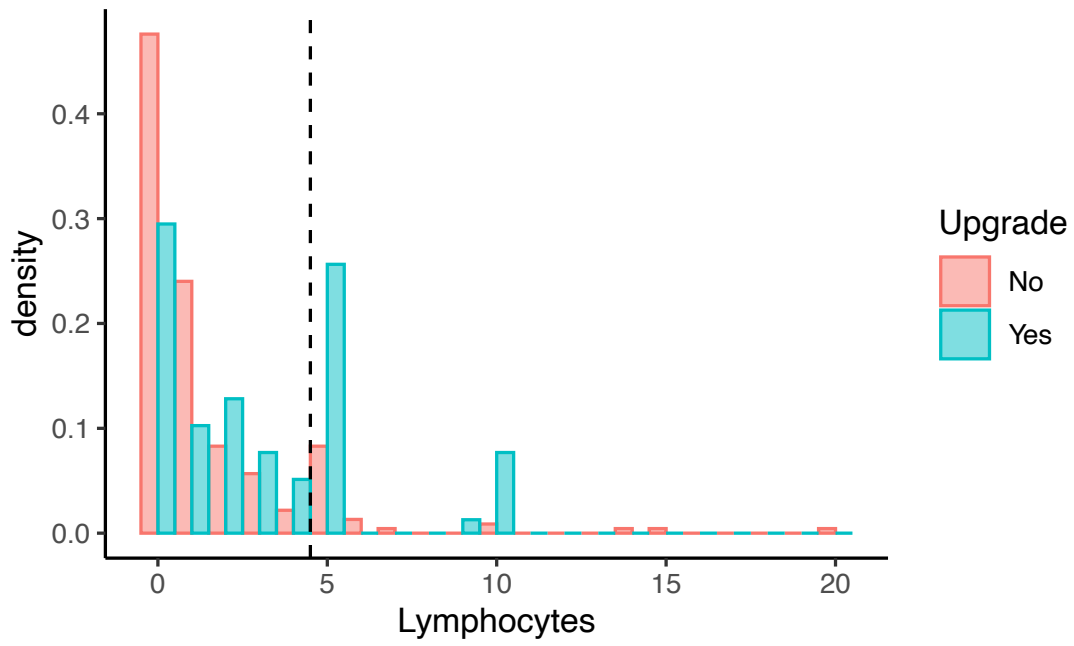

Supplement: 13058_2024_1857_MOESM3_ESM.pdf [file 13058_2024_1857_MOESM3_ESM.pdf]
